# Supplementary material for: Micro-scale organization of non-cyanobacterial diazotrophs drives nitrogen fixation in marine particles
Source: Research Square preprint supplement (doi:10.21203/rs.3.rs-7705582/v1), 2025-10-29
Supplement: Supplementary file 2 [file 8e641e9fae8f93d9b33ff561.xlsx]

## Sheet: Feuil1
MIMS results
		Isotopic ratio 15N/14N
		raw sample			ref SW			Net sample			Atom % ¹⁵N (from δ¹⁵N)
	ech	At%		D At% k=2	At%		D At% k=2	At%		D At% k=2
	Nat 12h	0.37	±	0.01	0.34	±	0.01	0.03	±	0.0141421	0.364676
	Nat 24h	0.36	±	0.01	0.33	±	0.01	0.03	±	0.0141421	0.364676
	NCDs C 24h	35.13	±	0.1	0.33	±	0.01	34.77	±	0.100499	0.377297
	NCDs + P C 24h	38.47	±	0.16	0.33	±	0.01	38.11	±	0.160312	0.37851
	NCDs + P + N A 24h	48.31	±	0.1	0.33	±	0.01	47.95	±	0.100499	0.382084
	NCDs C 12h	18.03	±	0.04	0.33	±	0.01	17.66	±	0.0412311	0.371081
	Nat 72h	0.36	±	0.01	0.34	±	0.01	0.02	±	0.0141421	0.364673
	NCDs + P A 12h	42.38	±	0.13	0.32	±	0.01	42.01	±	0.130384	0.379927
	NCDs + P + N B 12h	43.07	±	0.11	0.32	±	0.01	42.7	±	0.110454	0.380177
	NCDs + P + N A 72h	18.52	±	0.04	0.32	±	0.01	18.16	±	0.0412311	0.371263
	NCDs + P A 72h	34.69	±	0.15	0.32	±	0.01	34.33	±	0.150333	0.377137
	NCDs C 72h	26.88	±	0.07	0.32	±	0.01	26.52	±	0.0707107	0.3743
	NCDs A 12h	18.45	±	0.04	0.32	±	0.01	18.08	±	0.0412311	0.371234
	NCDs B 12h	21.27	±	0.06	0.32	±	0.01	20.9	±	0.0608276	0.372258
	T0 12h	40.63	±	0.17	0.32	±	0.01	40.26	±	0.170294	0.379291
	T0 24h	41.02	±	0.12	0.32	±	0.01	40.66	±	0.120416	0.379436
	T0 72h	31.4	±	0.1	0.32	±	0.01	31.04	±	0.100499	0.375942
