# Supplementary material for: Micro-scale organization of non-cyanobacterial diazotrophs drives nitrogen fixation in marine particles
Source: Research Square preprint supplement (doi:10.21203/rs.3.rs-7705582/v1), 2025-10-29
Supplement: Supplementary file 3 [file 9ccf700e700ba2d1c9b2b084.xlsx]

## Sheet: Feuille 1
Treatment	Incubation	DAPI	NifH	total.dapi.mL	sd_total_cell	se_total_cell	mean_dapi_mL	NifH cell.mL-1	sd_nifh_cell	se_nifh_cell	mean_nifh_cell
1	12h	3645	202	251505	103545	23153.3	183157	13938	14679.4	3282.42	24212.1
1	12h	4322	226	298218				15594
1	12h	4210	554	290490				38226
1	12h	3709	246	255921				16974
1	12h	6970	696	480930				48024
1	12h	3609	735	249021				50715
1	12h	1457	147	100533				10143
1	12h	2841	157	196029				10833
1	12h	1847	257	127443				17733
1	12h	1878	315	129582				21735
1	12h	1828	835	126132				57615
1	12h	1768	193	121992				13317
1	12h	1225	525	84525				36225
1	12h	1219	211	84111				14559
1	12h	1717	210	118473				14490
1	12h	1515	270	104535				18630
1	12h	4086	507	281934				34983
1	12h	1240	267	85560				18423
1	12h	2541	135	175329				9315
1	12h	1462	330	100878				22770
1	24h	6870	3147	474030	351498	78597.3	701406	217143	55511.5	12412.7	201225
1	24h	4082	3258	281658				224802
1	24h	5749	3800	396681				262200
1	24h	7307	3478	504183				239982
1	24h	1979	3849	136551				265581
1	24h	2905	1434	200445				98946
1	24h	2451	1531	169119				105639
1	24h	10925	1979	753825				136551
1	24h	11570	1856	798330				128064
1	24h	12204	1426	842076				98394
1	24h	16062	2944	1108278				203136
1	24h	21206	2879	1463214				198651
1	24h	10925	3396	753825				234324
1	24h	16375	3225	1129875				222525
1	24h	13736	3277	947784				226113
1	24h	10416	3396	718704				234324
1	24h	12752	3410	879888				235290
1	24h	13270	3374	915630				232806
1	24h	12715	2926	877335				201894
1	24h	9807	3741	676683				258129
1	72h	1479	457	102051	42638	42638	134722	31533	4194.93	938.015	22438.8
1	72h	1494	241	103086				16629
1	72h	1927	272	132963				18768
1	72h	2834	295	195546				20355
1	72h	1700	352	117300				24288
1	72h	2074	369	143106				25461
1	72h	1794	342	123786				23598
1	72h	4182	321	288558				22149
1	72h	1549	409	106881				28221
1	72h	1859	360	128271				24840
1	72h	1326	312	91494				21528
1	72h	1966	175	135654				12075
1	72h	1826	281	125994				19389
1	72h	1487	355	102603				24495
1	72h	1880	350	129720				24150
1	72h	2211	322	152559				22218
1	72h	1987	272	137103				18768
1	72h	1643	313	113367				21597
1	72h	1908	345	131652				23805
1	72h	1924	361	132756				24909
2	12h	1974	168	136206	24596.7	24596.7	84759.6	11592	5492.14	1228.08	9504.75
2	12h	1750	90	120750				6210
2	12h	1080	24	74520				1656
2	12h	1533	217	105777				14973
2	12h	1340	123	92460				8487
2	12h	1361	272	93909				18768
2	12h	1021	156	70449				10764
2	12h	1043	296	71967				20424
2	12h	1313	140	90597				9660
2	12h	931	279	64239				19251
2	12h	1027	106	70863				7314
2	12h	1068	75	73692				5175
2	12h	800	95	55200				6555
2	12h	952	96	65688				6624
2	12h	1074	193	74106				13317
2	12h	1267	151	87423				10419
2	12h	1252	70	86388				4830
2	12h	1168	60	80592				4140
2	12h	1978	31	136482				2139
2	12h	636	113	43884				7797
2	24h	2230	44	153870	322614	322614	412986	3036	5570.71	1245.65	10581.1
2	24h	1972	45	136068				3105
2	24h	1510	16	104190				1104
2	24h	1718	80	118542				5520
2	24h	1409	156	97221				10764
2	24h	1676	262	115644				18078
2	24h	5062	133	349278				9177
2	24h	11085	136	764865				9384
2	24h	9191	198	634179				13662
2	24h	1440	162	99360				11178
2	24h	4234	91	292146				6279
2	24h	7413	189	511497				13041
2	24h	6911	210	476859				14490
2	24h	3316	254	228804				17526
2	24h	5882	256	405858				17664
2	24h	10457	307	721533				21183
2	24h	12386	190	854634				13110
2	24h	2190	144	151110				9936
2	24h	13182	118	909558				8142
2	24h	16442	76	1134498				5244
2	72h	3189	218	220041	51883.5	51883.5	255100	15042	9111.4	2037.37	20565.5
2	72h	3984	66	274896				4554
2	72h	5123	76	353487				5244
2	72h	3845	230	265305				15870
2	72h	4653	291	321057				20079
2	72h	4638	355	320022				24495
2	72h	3883	429	267927				29601
2	72h	4172	281	287868				19389
2	72h	3858	231	266202				15939
2	72h	3569	244	246261				16836
2	72h	3472	219	239568				15111
2	72h	3820	236	263580				16284
2	72h	2990	515	206310				35535
2	72h	3561	539	245709				37191
2	72h	2436	498	168084				34362
2	72h	3659	370	252471				25530
2	72h	4359	165	300771				11385
2	72h	3827	279	264063				19251
2	72h	2959	398	204171				27462
2	72h	1945	321	134205				22149
3	12h	1003	136	69207	73031	73031	107581	9384	3961.3	885.773	6737.85
3	12h	1947	78	134343				5382
3	12h	1786	140	123234				9660
3	12h	1544	34	106536				2346
3	12h	2363	45	163047				3105
3	12h	1042	62	71898				4278
3	12h	932	122	64308				8418
3	12h	925	153	63825				10557
3	12h	855	66	58995				4554
3	12h	674	188	46506				12972
3	12h	653	40	45057				2760
3	12h	1493	112	103017				7728
3	12h	978	51	67482				3519
3	12h	1022	42	70518				2898
3	12h	2089	84	144141				5796
3	12h	2203	22	152007				1518
3	12h	5459	165	376671				11385
3	12h	924	234	63756				16146
3	12h	1719	96	118611				6624
3	12h	1572	83	108468				5727
3	24h	18829	1636	1299201	316473	316473	820279	112884	45932.9	10270.9	119218
3	24h	15990	1800	1103310				124200
3	24h	17875	1701	1233375				117369
3	24h	18895	1358	1303755				93702
3	24h	13198	1844	910662				127236
3	24h	12995	1672	896655				115368
3	24h	13272	2296	915768				158424
3	24h	10356	1530	714564				105570
3	24h	9986	1167	689034				80523
3	24h	13110	1212	904590				83628
3	24h	8233	1877	568077				129513
3	24h	17326	1570	1195494				108330
3	24h	9503	1239	655707				85491
3	24h	5985	1520	412965				104880
3	24h	5219	1188	360111				81972
3	24h	9712	1398	670128				96462
3	24h	9216	4270	635904				294630
3	24h	11669	1485	805161				102465
3	24h	14126	1924	974694				132756
3	24h	2267	1869	156423				128961
3	72h	3113	162	214797	54708.8	54708.8	198175	11178	2639.06	590.112	8438.7
3	72h	2514	83	173466				5727
3	72h	3571	152	246399				10488
3	72h	3136	73	216384				5037
3	72h	3340	121	230460				8349
3	72h	1996	122	137724				8418
3	72h	1814	116	125166				8004
3	72h	2104	127	145176				8763
3	72h	2896	123	199824				8487
3	72h	2908	111	200652				7659
3	72h	4712	99	325128				6831
3	72h	4476	77	308844				5313
3	72h	2766	126	190854				8694
3	72h	2453	116	169257				8004
3	72h	3150	108	217350				7452
3	72h	3473	73	239637				5037
3	72h	2537	119	175053				8211
3	72h	1976	186	136344				12834
3	72h	2599	231	179331				15939
3	72h	1908	121	131652				8349
