# Supplementary material for: Micro-scale organization of non-cyanobacterial diazotrophs drives nitrogen fixation in marine particles
Source: Research Square preprint supplement (doi:10.21203/rs.3.rs-7705582/v1), 2025-10-29
Supplement: Supplementary file 4 [file faed539efd0b8a742bd11fb2.xlsx]

## Sheet: Feuil1
Particle	Treatment	Incubation	Zone	Area_µm2	NifH+	RSG	DAPI	NifH_relative_distribution (%)	RSG_relative_distribution (%)	NifH_density (cell.µm2)	RSG_density (cell.µm2)	DAPI_density (cell.µm2)	r_out	r_in	a	b	c	a_out	b_out	c_out	a_in	b_in	c_in	Volume (µm3)	rho_NifH_zone (cell.µm3-1)	NifH_cell_in_shell	rho_DAPI_zone (cell.µm3-1)	DAPI_cell_in_shell	rho_RSG_zone (cell.µm3-1)	rsg_cell_in_shell	Total_NifH_per_particle	Total_DAPI_per_particle	Total_RSG_per_particle	Shell_volume (µm3)	NifH_rho_mean_zone	DAPI_rho_mean_zone	RSGI_rho_mean_zone
P1	2	72H	Peripheral	24273	10	51	682	1.46628	7.47801	0.00041198	0.0021011	0.0280971	0.2	0	210.5	42.5	42.5	42.1	8.5	8.5	0	0	0	48546	0.00020599	2.62455	0.0140485	178.994	0.00105055	13.3852	1382.49	17085.1	2562.98	12741.1	0.000642857	0.0131143	0.00147143
P1	2	72H	External	20003	20	77	641	3.12012	12.0125	0.00099985	0.00384942	0.0320452	0.4	0.2	210.5	42.5	42.5	84.2	17	17	42.1	8.5	8.5	40006	0.000499925	44.5873	0.0160226	1429.02	0.00192471	171.661				89188
P1	2	72H	Median	14294	45	39	281	16.0142	13.879	0.00314817	0.00272842	0.0196586	0.6	0.4	210.5	42.5	42.5	126.3	25.5	25.5	84.2	17	17	28588	0.00157409	381.058	0.0098293	2379.49	0.00136421	330.25				242082
P1	2	72H	Internal	8569	10	30	170	5.88235	17.6471	0.001167	0.00350099	0.019839	0.8	0.6	210.5	42.5	42.5	168.4	34	34	126.3	25.5	25.5	17138	0.000583499	275.074	0.00991948	4676.26	0.0017505	825.223				471422
P1	2	72H	Core	2861	5	9	62	8.06452	14.5161	0.00174764	0.00314575	0.0216707	1	0.8	210.5	42.5	42.5	210.5	42.5	42.5	168.4	34	34	5722	0.00087382	679.142	0.0108354	8421.36	0.00157288	1222.46				777210
P3	2	72H	Peripheral	29349	45	52	273	16.4835	19.0476	0.00153327	0.00177178	0.00930185	0.2	0	221.5	45	45	44.3	9	9	0	0	0	58698	0.000766636	11.523	0.00465093	69.9064	0.00088589	13.3155	4901.81	11362.8	4322.07	15030.6	0.0015703	0.00489492	0.00136788
P3	2	72H	External	22832	64	51	251	25.498	20.3187	0.00280308	0.00223371	0.0109933	0.4	0.2	221.5	45	45	88.6	18	18	44.3	9	9	45664	0.00140154	147.462	0.00549667	578.329	0.00111685	117.509				105214					Incubation	Treatment	DAPI_rho_mean_zone	NifH_rho_mean_zone	RSGI_rho_mean_zone	DAPI_rho_zone_SD	NifH_rho_zone_SD	RSG_rho_zone_SD
P3	2	72H	Median	16296	74	63	125	59.2	50.4	0.00454099	0.00386598	0.00767059	0.6	0.4	221.5	45	45	132.9	27	27	88.6	18	18	32592	0.0022705	648.413	0.0038353	1095.29	0.00193299	552.027				285582					72h	2	0.00646908	0.000594224	0.000906652	0.00507339	0.000235614	7.94547e-05
P3	2	72H	Internal	9774	55	39	101	54.4554	38.6139	0.00562717	0.00399018	0.0103335	0.8	0.6	221.5	45	45	177.2	36	36	132.9	27	27	19548	0.00281359	1564.73	0.00516677	2873.41	0.00199509	1109.54				556134							0.00860721	0.00109912	0.00145518	0.00496981	0.00037882	0.000329735
P3	2	72H	Core	3262	18	18	48	37.5	37.5	0.00551809	0.00551809	0.0147149	1	0.8	221.5	45	45	221.5	45	45	177.2	36	36	6524	0.00275904	2529.68	0.00735745	6745.82	0.00275904	2529.68				916869							0.00639289	0.00213458	0.00170116	0.00245869	0.000322235	0.0002327
P2	2	72H	Peripheral	27997	42	45	101	41.5842	44.5545	0.00150016	0.00160732	0.00360753	0.2	0	238	44	44	47.6	8.8	8.8	0	0	0	55994	0.00075008	11.5816	0.00180376	27.851	0.000803658	12.4089	3417.16	11742.7	2385.56	15440.5	0.00142126	0.00426378	0.00123476				0.00706567	0.00177093	0.00171672	0.00198258	0.000905924	0.00016651
P2	2	72H	External	21762	58	60	220	26.3636	27.2727	0.0026652	0.0027571	0.0101094	0.4	0.2	238	44	44	95.2	17.6	17.6	47.6	8.8	8.8	43524	0.0013326	144.032	0.00505468	546.327	0.00137855	148.998				108083							0.00801647	0.00178746	0.00178746	0.00195853	0.000769604	0.000589788
P2	2	72H	Median	15555	78	55	184	42.3913	29.8913	0.00501446	0.00353584	0.011829	0.6	0.4	238	44	44	142.8	26.4	26.4	95.2	17.6	17.6	31110	0.00250723	735.545	0.0059145	1735.13	0.00176792	518.653				293369
P2	2	72H	Internal	9326	33	26	120	27.5	21.6667	0.00353849	0.0027879	0.0128673	0.8	0.6	238	44	44	190.4	35.2	35.2	142.8	26.4	26.4	18652	0.00176925	1010.77	0.00643363	3675.52	0.00139395	796.362				571298
P2	2	72H	Core	3108	10	6	38	26.3158	15.7895	0.0032175	0.0019305	0.0122265	1	0.8	238	44	44	238	44	44	190.4	35.2	35.2	6216	0.00160875	1515.23	0.00611326	5757.89	0.000965251	909.14				941870
P5	3	72H	Peripheral	15279	37	81	282	13.1206	28.7234	0.00242162	0.00530139	0.0184567	0.2	0	164	51.5	51.5	32.8	10.3	10.3	0	0	0	30558	0.00121081	17.6487	0.00922835	134.512	0.0026507	38.6364	4869.88	18638.3	7099.92	14576	0.00167362	0.00893383	0.00324117
P5	3	72H	External	11869	38	73	177	21.4689	41.2429	0.00320162	0.00615048	0.0149128	0.4	0.2	164	51.5	51.5	65.6	20.6	20.6	32.8	10.3	10.3	23738	0.00160081	163.333	0.0074564	760.789	0.00307524	313.772				102032
P5	3	72H	Median	8489	26	65	165	15.7576	39.3939	0.00306279	0.00765697	0.0194369	0.6	0.4	164	51.5	51.5	98.4	30.9	30.9	65.6	20.6	20.6	16978	0.00153139	424.109	0.00971846	2691.46	0.00382848	1060.27				276943
P5	3	72H	Internal	5091	31	43	96	32.2917	44.7917	0.00608918	0.00844628	0.0188568	0.8	0.6	164	51.5	51.5	131.2	41.2	41.2	98.4	30.9	30.9	10182	0.00304459	1641.98	0.0094284	5084.83	0.00422314	2277.58				539310
P5	3	72H	Core	1695	10	13	38	26.3158	34.2105	0.00589971	0.00766962	0.0224189	1	0.8	164	51.5	51.5	164	51.5	51.5	131.2	41.2	41.2	3390	0.00294985	2622.81	0.0112094	9966.68	0.00383481	3409.65				889133
P1	3	72H	Peripheral	9979	52	78	121	42.9752	64.4628	0.00521094	0.00781641	0.0121255	0.2	0	172.5	60	60	34.5	12	12	0	0	0	19958	0.00260547	54.2196	0.00606273	126.165	0.00390821	81.3294	3701.38	8720.14	5081.7	20809.9	0.00258058	0.00546793	0.00366333
P1	3	72H	External	7750	50	66	85	58.8235	77.6471	0.00645161	0.00851613	0.0109677	0.4	0.2	172.5	60	60	69	24	24	34.5	12	12	15500	0.00322581	469.901	0.00548387	798.832	0.00425806	620.27				145669					Incubation	Treatment	DAPI_rho_mean_zone	NifH_rho_mean_zone	RSGI_rho_mean_zone	DAPI_rho_zone_SD	NifH_rho_zone_SD	RSG_rho_zone_SD
P1	3	72H	Median	5546	31	42	60	51.6667	70	0.00558961	0.00757303	0.0108186	0.6	0.4	172.5	60	60	103.5	36	36	69	24	24	11092	0.00279481	1105.03	0.0054093	2138.78	0.00378651	1497.14				395388					72h	3	0.0073089	0.00135482	0.0026621	0.00145248	0.000615244	0.000606917
P1	3	72H	Internal	3324	8	15	34	23.5294	44.1176	0.00240674	0.00451264	0.0102286	0.8	0.6	172.5	60	60	138	48	48	103.5	36	36	6648	0.00120337	926.554	0.00511432	3937.86	0.00225632	1737.29				769967							0.00667054	0.00243261	0.00330467	0.000747173	0.000632834	0.000484426
P1	3	72H	Core	1108	2	2	3	66.6667	66.6667	0.00180505	0.00180505	0.00270758	1	0.8	172.5	60	60	172.5	60	60	138	48	48	2216	0.000902527	1145.67	0.00135379	1718.51	0.000902527	1145.67				1.2694e+06							0.0071016	0.00194652	0.00327273	0.00197997	0.000483027	0.000418092
P4	3	72H	Peripheral	16814	25	65	212	11.7925	30.6604	0.00148686	0.00386583	0.0126085	0.2	0	195.5	50.5	50.5	39.1	10.1	10.1	0	0	0	33628	0.000743428	12.4207	0.00630427	105.328	0.00193291	32.2939	3707.49	13186	7516.31	16707.4	0.00172429	0.00651159	0.0026132				0.00806049	0.00231828	0.00353092	0.00168507	0.000697352	0.000747807
P4	3	72H	External	13062	71	77	174	40.8046	44.2529	0.00543561	0.00589496	0.0133211	0.4	0.2	195.5	50.5	50.5	78.2	20.2	20.2	39.1	10.1	10.1	26124	0.00271781	317.852	0.00666054	778.961	0.00294748	344.713				116952							0.00642536	0.00182052	0.00321268	0.00388898	0.000814244	0.00118616
P4	3	72H	Median	9340	34	46	107	31.7757	42.9907	0.00364026	0.00492505	0.0114561	0.6	0.4	195.5	50.5	50.5	117.3	30.3	30.3	78.2	20.2	20.2	18680	0.00182013	577.782	0.00572805	1818.31	0.00246253	781.705				317440
P4	3	72H	Internal	5604	26	41	96	27.0833	42.7083	0.00463954	0.0073162	0.0171306	0.8	0.6	195.5	50.5	50.5	156.4	40.4	40.4	117.3	30.3	30.3	11208	0.00231977	1434.02	0.00856531	5294.84	0.0036581	2261.34				618173
P4	3	72H	Core	1866	5	15	19	26.3158	78.9474	0.00267953	0.00803859	0.0101822	1	0.8	195.5	50.5	50.5	195.5	50.5	50.5	156.4	40.4	40.4	3732	0.00133976	1365.42	0.0050911	5188.6	0.00401929	4096.26				1.01915e+06
P1	2	12H	Peripheral	360	3	14	20	15	70	0.00833333	0.0388889	0.0555556	0.2	0	25	9	9	5	1.8	1.8	0	0	0	720	0.00416667	0.282743	0.0277778	1.88496	0.0194444	1.31947	16.5053	225.144	200.25	67.8584	0.004	0.028	0.022
P1	2	12H	External	279	3	13	17	17.6471	76.4706	0.0107527	0.046595	0.0609319	0.4	0.2	25	9	9	10	3.6	3.6	5	1.8	1.8	558	0.00537634	2.55381	0.0304659	14.4716	0.0232975	11.0665				475.009
P1	2	12H	Median	201	1	10	10	10	100	0.00497512	0.0497512	0.0497512	0.6	0.4	25	9	9	15	5.4	5.4	10	3.6	3.6	402	0.00248756	3.20724	0.0248756	32.0724	0.0248756	32.0724				1289.31
P1	2	12H	Internal	120	1	5	7	14.2857	71.4286	0.00833333	0.0416667	0.0583333	0.8	0.6	25	9	9	20	7.2	7.2	15	5.4	5.4	240	0.00416667	10.4615	0.0291667	73.2305	0.0208333	52.3075				2510.76
P1	2	12H	Core	40	0	2	2	0	100	0	0.05	0.05	1	0.8	25	9	9	25	9	9	20	7.2	7.2	80	0	0	0.025	103.484	0.025	103.484				4139.36
P2	2	12H	Peripheral	553	0	5	22	0	22.7273	0	0.00904159	0.039783	0.2	0	26	8.5	8.5	5.2	1.7	1.7	0	0	0	1106	0	0	0.0198915	1.25215	0.0045208	0.28458	6.32913	277.508	134.271	62.9491	0.000326158	0.0234834	0.00652316
P2	2	12H	External	429	0	4	18	0	22.2222	0	0.00932401	0.041958	0.4	0.2	26	8.5	8.5	10.4	3.4	3.4	5.2	1.7	1.7	858	0	0	0.020979	9.24428	0.004662	2.05428				440.644					Incubation	Treatment	DAPI_rho_mean_zone	NifH_rho_mean_zone	RSGI_rho_mean_zone	DAPI_rho_zone_SD	NifH_rho_zone_SD	RSG_rho_zone_SD
P2	2	12H	Median	306	0	3	14	0	21.4286	0	0.00980392	0.0457516	0.6	0.4	26	8.5	8.5	15.6	5.1	5.1	10.4	3.4	3.4	612	0	0	0.0228758	27.3602	0.00490196	5.86291				1196.03					12h	2	0.0207355	0.00117371	0.0086072	0.00484256	0.00176619	0.00634894
P2	2	12H	Internal	184	1	5	13	7.69231	38.4615	0.00543478	0.0271739	0.0706522	0.8	0.6	26	8.5	8.5	20.8	6.8	6.8	15.6	5.1	5.1	368	0.00271739	6.32913	0.0353261	82.2786	0.013587	31.6456				2329.12							0.0227273	0.00151515	0.0121212	0.00503128	0.00227955	0.00770145
P2	2	12H	Core	61	0	3	5	0	60	0	0.0491803	0.0819672	1	0.8	26	8.5	8.5	26	8.5	8.5	20.8	6.8	6.8	122	0	0	0.0409836	157.373	0.0245902	94.4237				3839.9							0.0232394	0.000704225	0.0119718	0.0010693	0.0010555	0.00828735
P3	2	12H	Peripheral	365	0	3	11	0	27.2727	0	0.00821918	0.030137	0.2	0	27	8	8	5.4	1.6	1.6	0	0	0	730	0	0	0.0150685	0.872554	0.00410959	0.237969	8.70941	173.011	77.6803	57.9058	0.000493583	0.0187562	0.00839092				0.030445	0.00351288	0.0140515	0.00461367	0.000626743	0.00360815
P3	2	12H	External	282	0	7	10	0	70	0	0.0248227	0.035461	0.4	0.2	27	8	8	10.8	3.2	3.2	5.4	1.6	1.6	564	0	0	0.0177305	7.18689	0.0124113	5.03083				405.341							0.0319149	0	0.0212766	0.00791891	0	0.00294728
P3	2	12H	Median	203	0	4	9	0	44.4444	0	0.0197044	0.044335	0.6	0.4	27	8	8	16.2	4.8	4.8	10.8	3.2	3.2	406	0	0	0.0221675	24.3889	0.00985222	10.8395				1100.21
P3	2	12H	Internal	123	1	2	6	16.6667	33.3333	0.00813008	0.0162602	0.0487805	0.8	0.6	27	8	8	21.6	6.4	6.4	16.2	4.8	4.8	246	0.00406504	8.70941	0.0243902	52.2565	0.00813008	17.4188				2142.52
P3	2	12H	Core	40	0	1	2	0	50	0	0.025	0.05	1	0.8	27	8	8	27	8	8	21.6	6.4	6.4	80	0	0	0.025	88.3064	0.0125	44.1532				3532.26
P1	2	24H	Peripheral	2749	22	4	74	29.7297	5.40541	0.00800291	0.00145507	0.0269189	0.2	0	79.5	26.5	26.5	15.9	5.3	5.3	0	0	0	5498	0.00400146	7.4861	0.0134594	25.1805	0.000727537	1.36111	909.551	4393.94	68.4966	1870.84	0.00353449	0.016887	0.000589082
P1	2	24H	External	2142	12	2	84	14.2857	2.38095	0.00560224	0.000933707	0.0392157	0.4	0.2	79.5	26.5	26.5	31.8	10.6	10.6	15.9	5.3	5.3	4284	0.00280112	36.6832	0.0196078	256.782	0.000466853	6.11387				13095.9
P1	2	24H	Median	1527	13	2	56	23.2143	3.57143	0.00851343	0.00130976	0.0366732	0.6	0.4	79.5	26.5	26.5	47.7	15.9	15.9	31.8	10.6	10.6	3054	0.00425671	151.309	0.0183366	651.794	0.000654879	23.2783				35546
P1	2	24H	Internal	917	4	1	32	12.5	3.125	0.00436205	0.00109051	0.0348964	0.8	0.6	79.5	26.5	26.5	63.6	21.2	21.2	47.7	15.9	15.9	1834	0.00218103	150.973	0.0174482	1207.79	0.000545256	37.7433				69221.2
P1	2	24H	Core	304	3	0	12	25	0	0.00986842	0	0.0394737	1	0.8	79.5	26.5	26.5	79.5	26.5	26.5	63.6	21.2	21.2	608	0.00493421	563.099	0.0197368	2252.4	0	0				114121
P2	2	24H	Peripheral	2686	14	3	86	16.2791	3.48837	0.00521221	0.0011169	0.0320179	0.2	0	76.5	26	26	15.3	5.2	5.2	0	0	0	5372	0.00260611	4.51626	0.0160089	27.7427	0.000558451	0.96777	1514.07	5620.7	404.764	1732.95	0.00429012	0.0195737	0.00113956
P2	2	24H	External	2090	15	2	85	17.6471	2.35294	0.00717703	0.000956938	0.0406699	0.4	0.2	76.5	26	26	30.6	10.4	10.4	15.3	5.2	5.2	4180	0.00358852	43.5311	0.0203349	246.676	0.000478469	5.80415				12130.7					Incubation	Treatment	DAPI_rho_mean_zone	NifH_rho_mean_zone	RSGI_rho_mean_zone	DAPI_rho_zone_SD	NifH_rho_zone_SD	RSG_rho_zone_SD
P2	2	24H	Median	1490	20	7	62	32.2581	11.2903	0.0134228	0.00469799	0.0416107	0.6	0.4	76.5	26	26	45.9	15.6	15.6	30.6	10.4	10.4	2980	0.00671141	220.981	0.0208054	685.04	0.00234899	77.3432				32926.1					24h	2	0.0149652	0.00372578	0.000745156	0.00110553	0.000666445	0.000108325
P2	2	24H	Internal	895	10	4	41	24.3902	9.7561	0.0111732	0.00446927	0.0458101	0.8	0.6	76.5	26	26	61.2	20.8	20.8	45.9	15.6	15.6	1790	0.00558659	358.208	0.022905	1468.65	0.00223464	143.283				64119.3							0.0181194	0.00510856	0.00119732	0.00268292	0.00160984	0.000595712
P2	2	24H	Core	298	5	1	18	27.7778	5.55556	0.0167785	0.0033557	0.0604027	1	0.8	76.5	26	26	76.5	26	26	61.2	20.8	20.8	596	0.00838926	886.83	0.0302013	3192.59	0.00167785	177.366				105710							0.0185682	0.00548098	0.001566	0.00174744	0.0010083	0.00069853
P3	2	24H	Peripheral	2617	24	5	81	29.6296	6.17284	0.00917081	0.00191058	0.0309515	0.2	0	78	27	27	15.6	5.4	5.4	0	0	0	5234	0.0045854	8.73732	0.0154757	29.4885	0.000955292	1.82028	2219.15	4117.21	622.295	1905.46	0.00688326	0.016038	0.00178965				0.0204918	0.00577496	0.00149031	0.00229719	0.00210352	0.000699917
P3	2	24H	External	2032	37	11	58	63.7931	18.9655	0.0182087	0.00541339	0.0285433	0.4	0.2	78	27	27	31.2	10.8	10.8	15.6	5.4	5.4	4064	0.00910433	121.436	0.0142717	190.359	0.00270669	36.1025				13338.2							0.021861	0.00784753	0.00168161	0.00615308	0.00172935	0.00098171
P3	2	24H	Median	1453	16	5	48	33.3333	10.4167	0.0110117	0.00344116	0.0330351	0.6	0.4	78	27	27	46.8	16.2	16.2	31.2	10.8	10.8	2906	0.00550585	199.333	0.0165175	597.998	0.00172058	62.2915				36203.8
P3	2	24H	Internal	872	17	3	37	45.9459	8.10811	0.0194954	0.00344037	0.0424312	0.8	0.6	78	27	27	62.4	21.6	21.6	46.8	16.2	16.2	1744	0.00974771	687.234	0.0212156	1495.75	0.00172018	121.277				70502.2
P3	2	24H	Core	290	6	2	9	66.6667	22.2222	0.0206897	0.00689655	0.0310345	1	0.8	78	27	27	78	27	27	62.4	21.6	21.6	580	0.0103448	1202.41	0.0155172	1803.62	0.00344828	400.804				116233
P1	3	12H	Peripheral	420	2	8	14	14.2857	57.1429	0.0047619	0.0190476	0.0333333	0.2	0	20	10	10	4	2	2	0	0	0	840	0.00238095	0.159573	0.0166667	1.11701	0.00952381	0.638292	13.1949	131.772	119.473	67.0206	0.0025729	0.0184391	0.0124357
P1	3	12H	External	327	2	8	13	15.3846	61.5385	0.00611621	0.0244648	0.0397554	0.4	0.2	20	10	10	8	4	4	4	2	2	654	0.0030581	1.43469	0.0198777	9.3255	0.0122324	5.73877				469.145
P1	3	12H	Median	232	1	6	9	11.1111	66.6667	0.00431034	0.0258621	0.0387931	0.6	0.4	20	10	10	12	6	6	8	4	4	464	0.00215517	2.74438	0.0193966	24.6994	0.012931	16.4663				1273.39
P1	3	12H	Internal	140	1	6	6	16.6667	100	0.00714286	0.0428571	0.0428571	0.8	0.6	20	10	10	16	8	8	12	6	6	280	0.00357143	8.8563	0.0214286	53.1378	0.0214286	53.1378				2479.76
P1	3	12H	Core	47	0	1	1	0	100	0	0.0212766	0.0212766	1	0.8	20	10	10	20	10	10	16	8	8	94	0	0	0.0106383	43.4921	0.0106383	43.4921				4088.26
P2	3	12H	Peripheral	271	3	4	16	18.75	25	0.0110701	0.0147601	0.0590406	0.2	0	19	8.5	8.5	3.8	1.7	1.7	0	0	0	542	0.00553506	0.25462	0.0295203	1.35797	0.00738007	0.339493	1.02131	106.854	26.0491	46.0013	0.00266312	0.0266312	0.00998668
P2	3	12H	External	210	1	6	13	7.69231	46.1538	0.0047619	0.0285714	0.0619048	0.4	0.2	19	8.5	8.5	7.6	3.4	3.4	3.8	1.7	1.7	420	0.00238095	0.766688	0.0309524	9.96695	0.0142857	4.60013				322.009					Incubation	Treatment	DAPI_rho_mean_zone	NifH_rho_mean_zone	RSGI_rho_mean_zone	DAPI_rho_zone_SD	NifH_rho_zone_SD	RSG_rho_zone_SD
P2	3	12H	Median	150	0	4	7	0	57.1429	0	0.0266667	0.0466667	0.6	0.4	19	8.5	8.5	11.4	5.1	5.1	7.6	3.4	3.4	300	0	0	0.0233333	20.3939	0.0133333	11.6537				874.025					12h	3	0.0244344	0.00361991	0.0135747	0.00608586	0.00121777	0.00395583
P2	3	12H	Internal	90	0	1	3	0	33.3333	0	0.0111111	0.0333333	0.8	0.6	19	8.5	8.5	15.2	6.8	6.8	11.4	5.1	5.1	180	0	0	0.0166667	28.3675	0.00555556	9.45582				1702.05							0.02331	0.00291375	0.0157343	0.00443062	0.000278248	0.0022776
P2	3	12H	Core	30	0	0	1	0	0	0	0	0.0333333	1	0.8	19	8.5	8.5	19	8.5	8.5	15.2	6.8	6.8	60	0	0	0.0166667	46.768	0	0				2806.08							0.0196078	0.00163399	0.0122549	0.00229458	0.000870266	0.00067703
P3	3	12H	Peripheral	414	3	18	24	12.5	75	0.00724638	0.0434783	0.057971	0.2	0	22.5	11	11	4.5	2.2	2.2	0	0	0	828	0.00362319	0.33055	0.0289855	2.6444	0.0217391	1.9833	18.4079	182.47	58.3955	91.2319	0.00305144	0.0231037	0.016565				0.020436	0.0027248	0.0122616	0.00215818	0.00144712	0.00656391
P3	3	12H	External	321	2	13	14	14.2857	92.8571	0.00623053	0.0404984	0.0436137	0.4	0.2	22.5	11	11	9	4.4	4.4	4.5	2.2	2.2	642	0.00311526	1.98948	0.0218069	13.9264	0.0202492	12.9316				638.623							0.0122951	0	0.00409836	0.00250477	0	0.00453956
P3	3	12H	Median	230	1	5	8	12.5	62.5	0.00434783	0.0217391	0.0347826	0.6	0.4	22.5	11	11	13.5	6.6	6.6	9	4.4	4.4	460	0.00217391	3.76827	0.0173913	30.1462	0.0108696	18.8414				1733.41
P3	3	12H	Internal	137	1	2	6	16.6667	33.3333	0.00729927	0.0145985	0.0437956	0.8	0.6	22.5	11	11	18	8.8	8.8	13.5	6.6	6.6	274	0.00364964	12.3196	0.0218978	73.9178	0.00729927	24.6393				3375.58
P3	3	12H	Core	45	0	0	1	0	0	0	0	0.0222222	1	0.8	22.5	11	11	22.5	11	11	18	8.8	8.8	90	0	0	0.0111111	61.8349	0	0				5565.14
P1	3	24H	Peripheral	1760	0	6	49	0	12.2449	0	0.00340909	0.0278409	0.2	0	92.5	40	40	18.5	8	8	0	0	0	3520	0	0	0.0139205	69.0389	0.00170455	8.45374	63.7237	596.575	328.172	4959.53	0.000512295	0.00665984	0.0017418
P1	3	24H	External	1362	5	9	13	38.4615	69.2308	0.00367107	0.00660793	0.00954479	0.4	0.2	92.5	40	40	37	16	16	18.5	8	8	2724	0.00183554	63.7237	0.00477239	165.682	0.00330396	114.703				34716.7
P1	3	24H	Median	978	0	1	1	0	100	0	0.00102249	0.00102249	0.6	0.4	92.5	40	40	55.5	24	24	37	16	16	1956	0	0	0.000511247	48.1754	0.000511247	48.1754				94231
P1	3	24H	Internal	585	0	1	2	0	50	0	0.0017094	0.0034188	0.8	0.6	92.5	40	40	74	32	32	55.5	24	24	1170	0	0	0.0017094	313.68	0.000854701	156.84				183503
P1	3	24H	Core	195	0	0	0	0	0	0	0	0	1	0.8	92.5	40	40	92.5	40	40	74	32	32	390	0	0	0	0	0	0				302531
P2	3	24H	Peripheral	1949	3	7	23	13.0435	30.4348	0.00153925	0.00359159	0.0118009	0.2	0	83.5	43	43	16.7	8.6	8.6	0	0	0	3898	0.000769625	3.98182	0.00590046	30.5273	0.00179579	9.29091	39.7683	539.976	136.265	5173.71	0.000553097	0.0032264	0.00110619
P2	3	24H	External	1518	3	3	7	42.8571	42.8571	0.00197628	0.00197628	0.00461133	0.4	0.2	83.5	43	43	33.4	17.2	17.2	16.7	8.6	8.6	3036	0.000988142	35.7865	0.00230567	83.5019	0.000988142	35.7865				36216					Incubation	Treatment	DAPI_rho_mean_zone	NifH_rho_mean_zone	RSGI_rho_mean_zone	DAPI_rho_zone_SD	NifH_rho_zone_SD	RSG_rho_zone_SD
P2	3	24H	Median	1078	0	2	3	0	66.6667	0	0.00185529	0.00278293	0.6	0.4	83.5	43	43	50.1	25.8	25.8	33.4	17.2	17.2	2156	0	0	0.00139147	136.782	0.000927644	91.1878				98300.5					24h	3	0.00687	0.000226483	0.0014344	0.00438404	0.000316929	0.000240477
P2	3	24H	Internal	662	0	0	2	0	0	0	0	0.00302115	0.8	0.6	83.5	43	43	66.8	34.4	34.4	50.1	25.8	25.8	1324	0	0	0.00151057	289.165	0	0				191427							0.00233281	0.000777605	0.00155521	0.00158135	0.000556256	0.000951111
P2	3	24H	Core	217	0	0	0	0	0	0	0	0	1	0.8	83.5	43	43	83.5	43	43	66.8	34.4	34.4	434	0	0	0	0	0	0				315596							0.000816104	0.000136017	0.000680087	0.000373129	0.000101723	0.000159863
P3	3	24H	Peripheral	2914	0	6	19	0	31.5789	0	0.00205903	0.00652025	0.2	0	96	40	40	19.2	8	8	0	0	0	5828	0	0	0.00326012	16.7805	0.00102951	5.29909	30.1841	108.978	97.4962	5147.19	6.17971e-05	0.00154493	0.000741565				0.000901713	0	0.000225428	0.000799162	0	0.000345845
P3	3	24H	External	2264	0	4	4	0	100	0	0.00176678	0.00176678	0.4	0.2	96	40	40	38.4	16	16	19.2	8	8	4528	0	0	0.000883392	31.8289	0.000883392	31.8289				36030.3							0	0	0	0	0	0
P3	3	24H	Median	1620	1	2	2	50	100	0.000617284	0.00123457	0.00123457	0.6	0.4	96	40	40	57.6	24	24	38.4	16	16	3240	0.000308642	30.1841	0.000617284	60.3682	0.000617284	60.3682				97796.5
P3	3	24H	Internal	971	0	0	0	0	0	0	0	0	0.8	0.6	96	40	40	76.8	32	32	57.6	24	24	1942	0	0	0	0	0	0				190446
P3	3	24H	Core	322	0	0	0	0	0	0	0	0	1	0.8	96	40	40	96	40	40	76.8	32	32	644	0	0	0	0	0	0				313978
